# Supplementary material for: Increased Mitochondrial Protein Levels and Bioenergetics in the Musculus Rectus Femoris of Wfs1‐Deficient Mice
Source: Hindawi journal article supplement (doi:10.1155/2018/3175313), 2018-01-01
Supplement: f1 [file 3175313.f1.pdf]

## Supplementary Information

Increased Mitochondrial Protein Levels and Bioenergetics in the Musculus Rectus Femoris of Wfs1-Deficient Mice

Margus Eimre<sup>a</sup> , Kalju Paju<sup>a</sup>, Nadežda Peet<sup>a</sup>, Lumme Kadaja<sup>a</sup>, Marian Tarrend<sup>a</sup>, Sergo Kasvandik<sup>b</sup>, Joosep Seppet<sup>c</sup>, Marilin Ivask<sup>a</sup>, Ehte Orlova<sup>a</sup>, Sulev Kõks<sup>a</sup>

<sup>a</sup> Chair of Pathological Physiology, Institute of Bio- and Translational Medicine, University of Tartu, Ravila 19, 50411 Tartu, Estonia

<sup>b</sup> Proteomics Core Facility, Institute of Technology, University of Tartu, Nooruse 1, 50411 Tartu, Estonia

<sup>c</sup> Department of Pathology, Tartu University Hospital, L. Puusepa 8, 51014 Tartu, Estonia

| Parameter of mitochondrial respiration | <i>m. rectus femoris</i> |                        | <i>m. soleus</i>   |                      | heart               |                     |
|----------------------------------------|--------------------------|------------------------|--------------------|----------------------|---------------------|---------------------|
|                                        | +/+                      | -/-                    | +/+                | -/-                  | +/+                 | -/-                 |
| $V_0$                                  | 0.12±0.02<br>n = 9       | 0.31±0.03 ***<br>n = 5 | 0.36±0.07<br>n = 7 | 0.28±0.04<br>n = 7   | 1.12±0.09<br>n = 8  | 1.02±0.07<br>n = 8  |
| $V_{ADP}$                              | 1.06±0.10<br>n = 9       | 1.48±0.13 *<br>n = 8   | 2.51±0.21<br>n = 7 | 1.66±0.11 *<br>n = 7 | 6.25±0.70<br>n = 8  | 5.02±0.36<br>n = 8  |
| $V_{Rot}$                              | 0.07±0.01<br>n = 9       | 0.11±0.02<br>n = 8     | 0.06±0.09<br>n = 7 | 0.06±0.03<br>n = 7   | 0.52±0.08<br>n = 8  | 0.48±0.05<br>n = 8  |
| $V_{Succ}$                             | 0.70±0.09<br>n = 9       | 1.13±0.09 **<br>n = 8  | 1.91±0.13<br>n = 7 | 1.42±0.11 *<br>n = 7 | 7.46±0.76<br>n = 8  | 6.38±0.45<br>n = 8  |
| $V_{Atr}$                              | 0.31±0.04<br>n = 9       | 0.54±0.04 ***<br>n = 8 | 0.88±0.07<br>n = 7 | 0.65±0.06<br>n = 7   | 2.75±0.19<br>n = 8  | 2.46±0.11<br>n = 8  |
| $V_{Ant}$                              | 0.09±0.02<br>n = 9       | 0.15±0.02<br>n = 8     | 0.31±0.10<br>n = 7 | 0.16±0.04<br>n = 7   | 0.84±0.10<br>n = 8  | 0.74±0.08<br>n = 8  |
| $V_{TMPD}$                             | 1.90±0.14<br>n = 9       | 2.35±0.22 *<br>n = 8   | 3.85±0.29<br>n = 7 | 3.73±0.47<br>n = 7   | 16.44±2.22<br>n = 8 | 14.60±1.60<br>n = 8 |
| $V_{NaN3}$                             | 0.65±0.06<br>n = 9       | 0.83±0.10<br>n = 8     | 1.58±0.15<br>n = 7 | 1.76±0.24<br>n = 7   | 2.99±0.17<br>n = 8  | 2.76±0.12<br>n = 8  |
| $V_{ADP}-V_0$                          | 0.94±0.08<br>n = 9       | 1.17±0.12<br>n = 8     | 2.15±0.22<br>n = 7 | 1.38±0.13 *<br>n = 7 | 5.13±0.69<br>n = 8  | 4.01±0.32<br>n = 8  |
| $V_{ADP}/V_0$                          | 10.60±1.18<br>n = 9      | 4.87±0.44 ***<br>n = 8 | 9.30±2.90<br>n = 7 | 8.63±3.39<br>n = 7   | 5.84±0.75<br>n = 8  | 5.06±0.46<br>n = 8  |

Table S1. Rates of mitochondrial respiration. Values are means  $\pm$  SE; n - the number of specimens studied. The rates of respiration (V) are given in nmol O<sub>2</sub>/min/mg wet weight.  $V_0$ , basal respiration without ADP;  $V_{ADP}$ , ADP-stimulated respiration;  $V_{Rot}$ , respiration in the presence of rotenone;  $V_{Succ}$ , ADP-stimulated respiration in the presence of rotenone and succinate;  $V_{Atr}$ , respiration after inhibition of succinate and ADP-stimulated respiration by atractyloside;  $V_{Ant}$ , respiration in the presence of AntA;  $V_{TMPD}$ , TMPD+ascorbate stimulated respiration;  $V_{NaN3}$ , TMPD-stimulated respiration after addition of NaN<sub>3</sub>;  $V_{ADP}-V_0$ , OXPHOS dependent respiration;  $V_{ADP}/V_0$ , respiration control index; \* p < 0.05, \*\* p < 0.01, \*\*\* p < 0.001 compared with wild type.

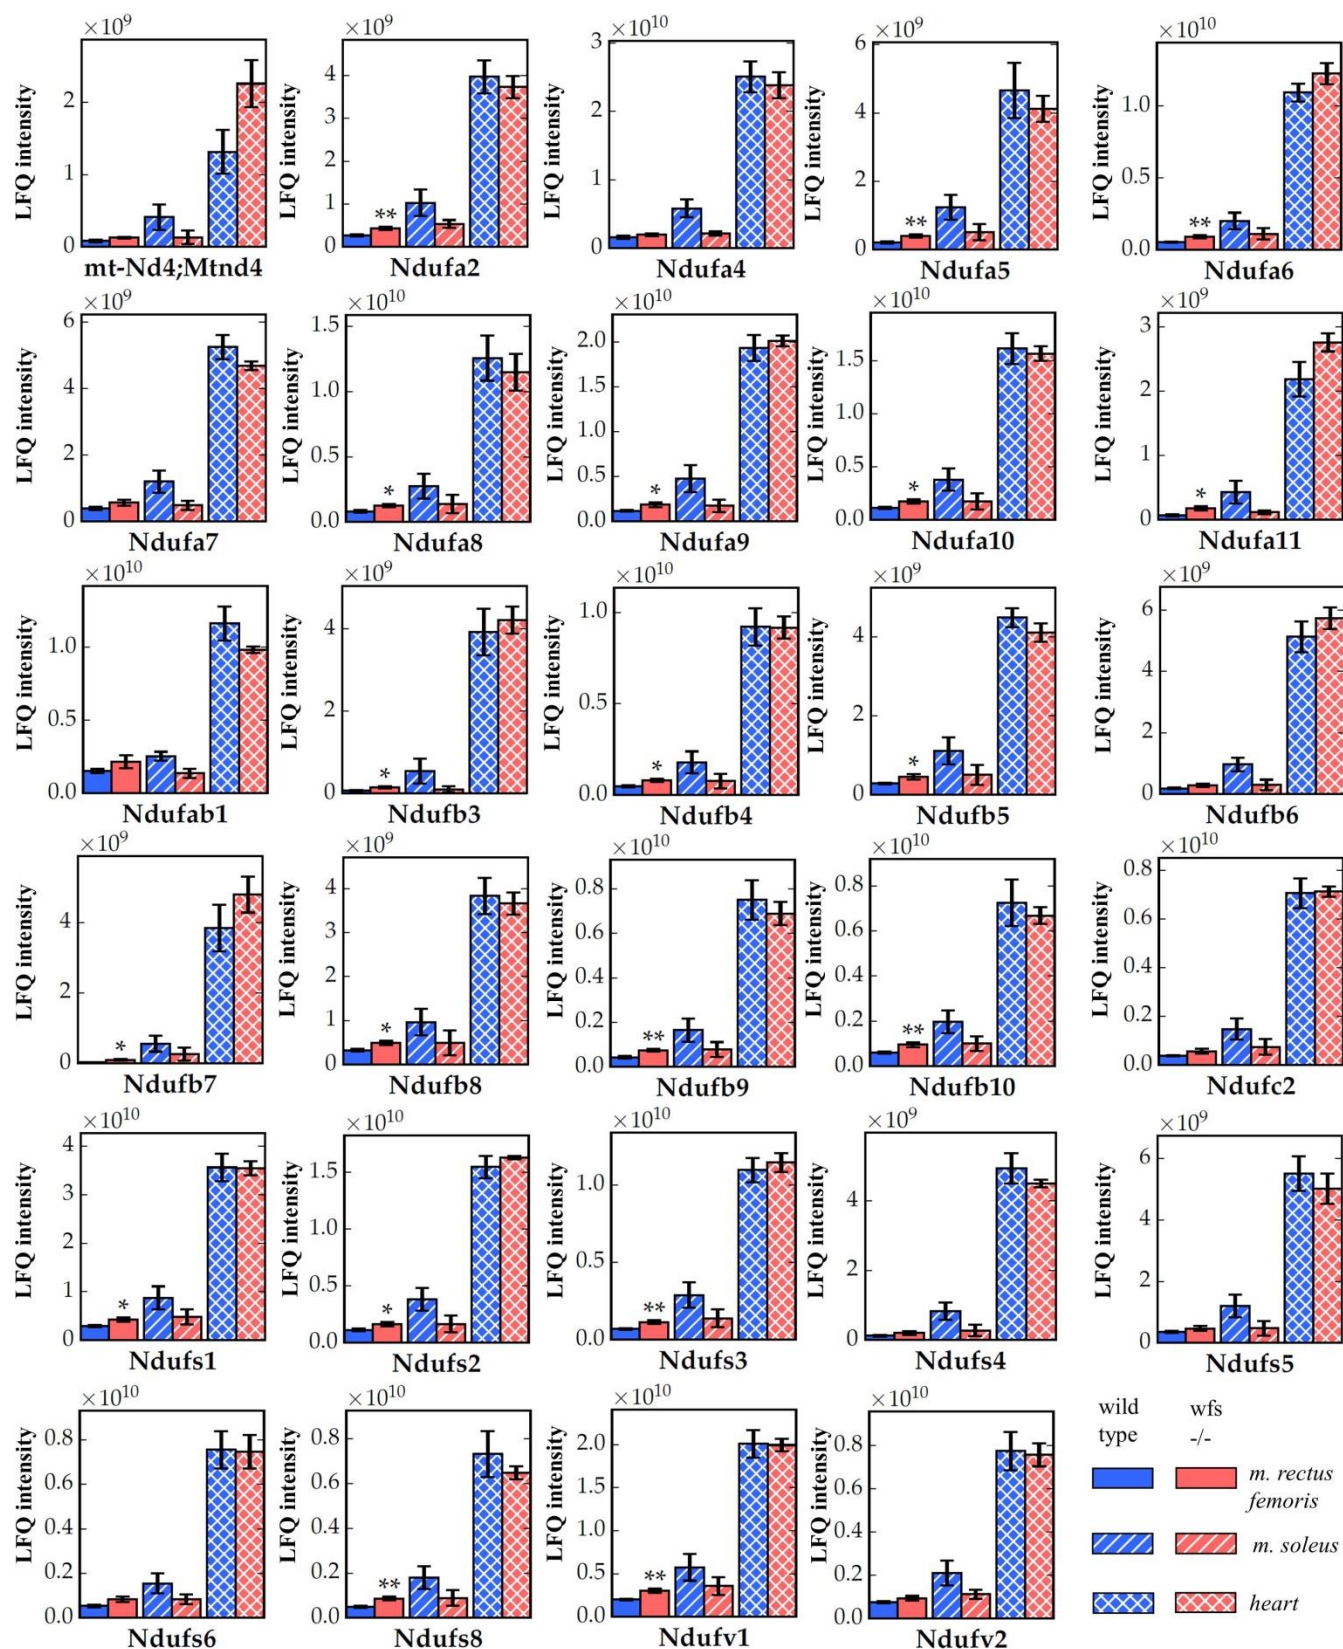

Figure S1. By LC/MS/MS analysis determined amounts of respiratory chain complex I subunits. Mtd4 – NADH-ubiquinone oxidoreductase chain 4, Ndufa – NADH dehydrogenase [ubiquinone] 1 alpha subcomplex subunits, Ndufb – NADH dehydrogenase [ubiquinone] 1 beta subcomplex subunits, Ndufc2 – NADH dehydrogenase [ubiquinone] 1 subunit C2, Ndufs – NADH dehydrogenase [ubiquinone] iron-sulfur proteins, Ndufv – NADH dehydrogenase [ubiquinone] flavoprotein; \* - p<0.05, \*\* - p<0.01 compared to wild type.

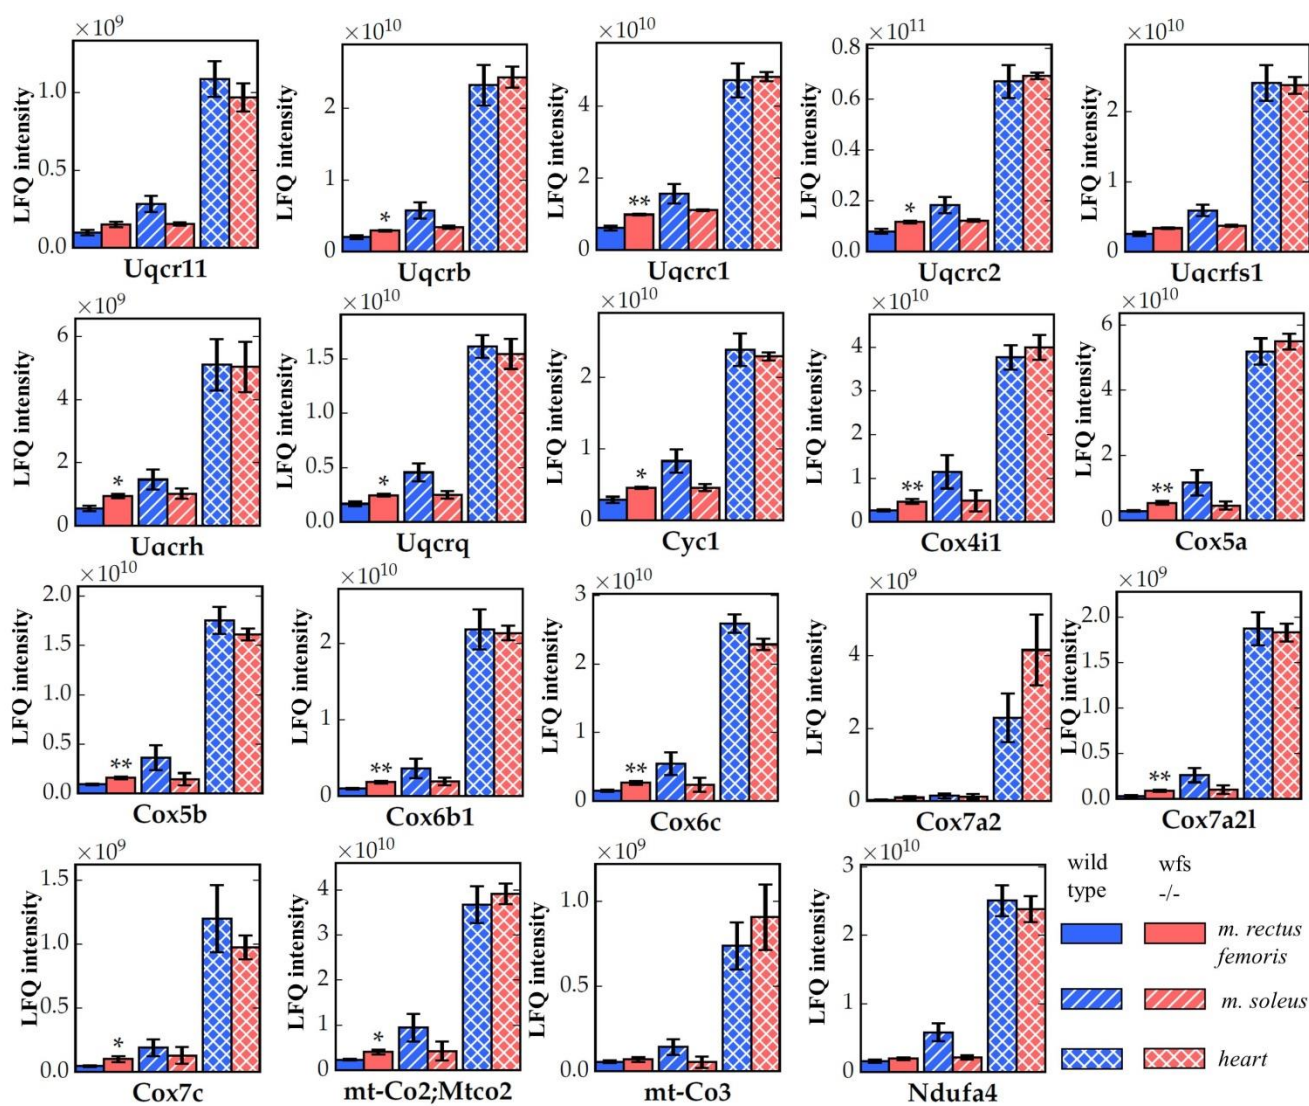

Figure S2. By LC/MS/MS analysis determined amounts of respiratory chain complex III and IV subunits. Uqcr11 – Cytochrome b-c1 complex subunit 10, Uqcrb – Cytochrome b-c1 complex subunit 7, Uqcrc1 – Cytochrome b-c1 complex subunit 1, Uqcrc2 – Cytochrome b-c1 complex subunit 2, Uqcrrs1 – Cytochrome b-c1 complex subunit Rieske, Uqcrh – Cytochrome b-c1 complex subunit 6, Uqcrrq – Cytochrome b-c1 complex subunit 8, Cyc1 – Cytochrome c1, heme protein, Cox4i1 – Cytochrome c oxidase subunit 4 isoform 1, Cox5a – Cytochrome c oxidase subunit 5A, Cox5b – Cytochrome c oxidase subunit 5B, Cox6b1 – Cytochrome c oxidase subunit 6B1, Cox6c – Cytochrome c oxidase subunit 6C, Cox7a2 – Cytochrome c oxidase subunit 7A2, Cox7a2l – Cytochrome c oxidase subunit 7A-related protein, Cox7c – Cytochrome c oxidase subunit 7C, mt-Co2 – Cytochrome c oxidase subunit 2, mt-Co3 – Cytochrome c oxidase subunit 3, Ndufa4 – Cytochrome c oxidase subunit NDUFA4; \* -  $p < 0.05$ , \*\* -  $p < 0.01$  compared to wild type.



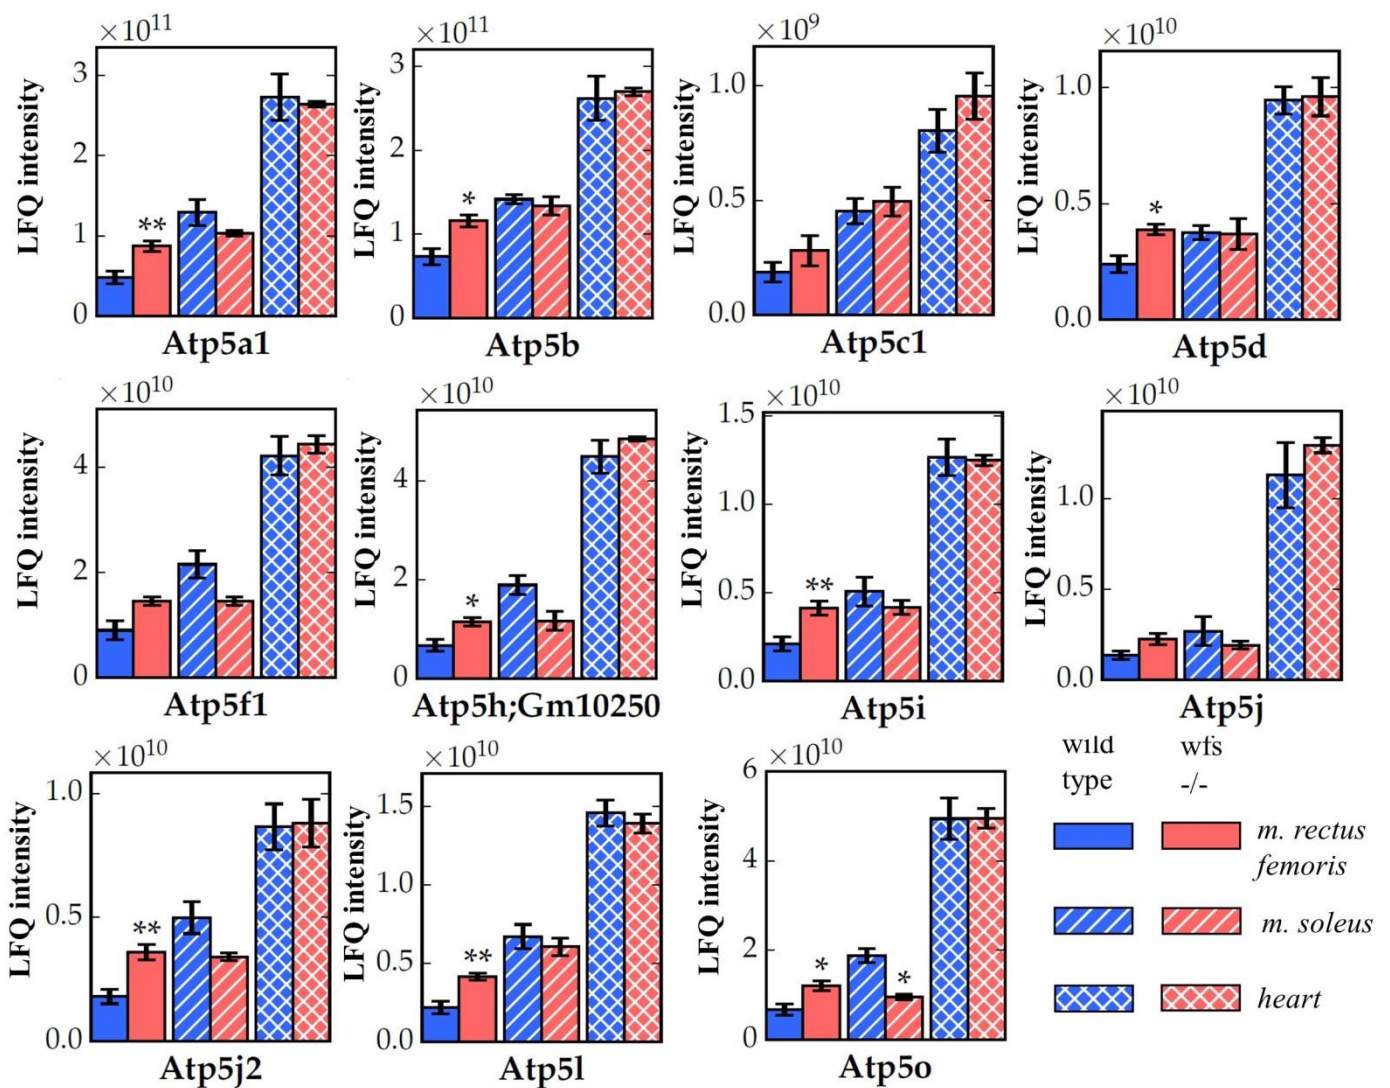

Figure S3. By LC/MS/MS analysis determined amounts of respiratory chain complex V subunits. Atp5a1 – ATP synthase subunit alpha, Atp5b – ATP synthase subunit beta, Atp5c1 – ATP synthase subunit gamma, Atp5d – ATP synthase subunit delta, Atp5f1 – ATP synthase F(0) complex subunit B1, Atp5h – ATP synthase subunit d, Atp5i – ATP synthase subunit e, Atp5j – ATP synthase-coupling factor 6, Atp5j2 – ATP synthase subunit f, Atp5l – ATP synthase subunit g, Atp5o – ATP synthase subunit O; \* -  $p < 0.05$ , \*\* -  $p < 0.01$  compared to wild type.

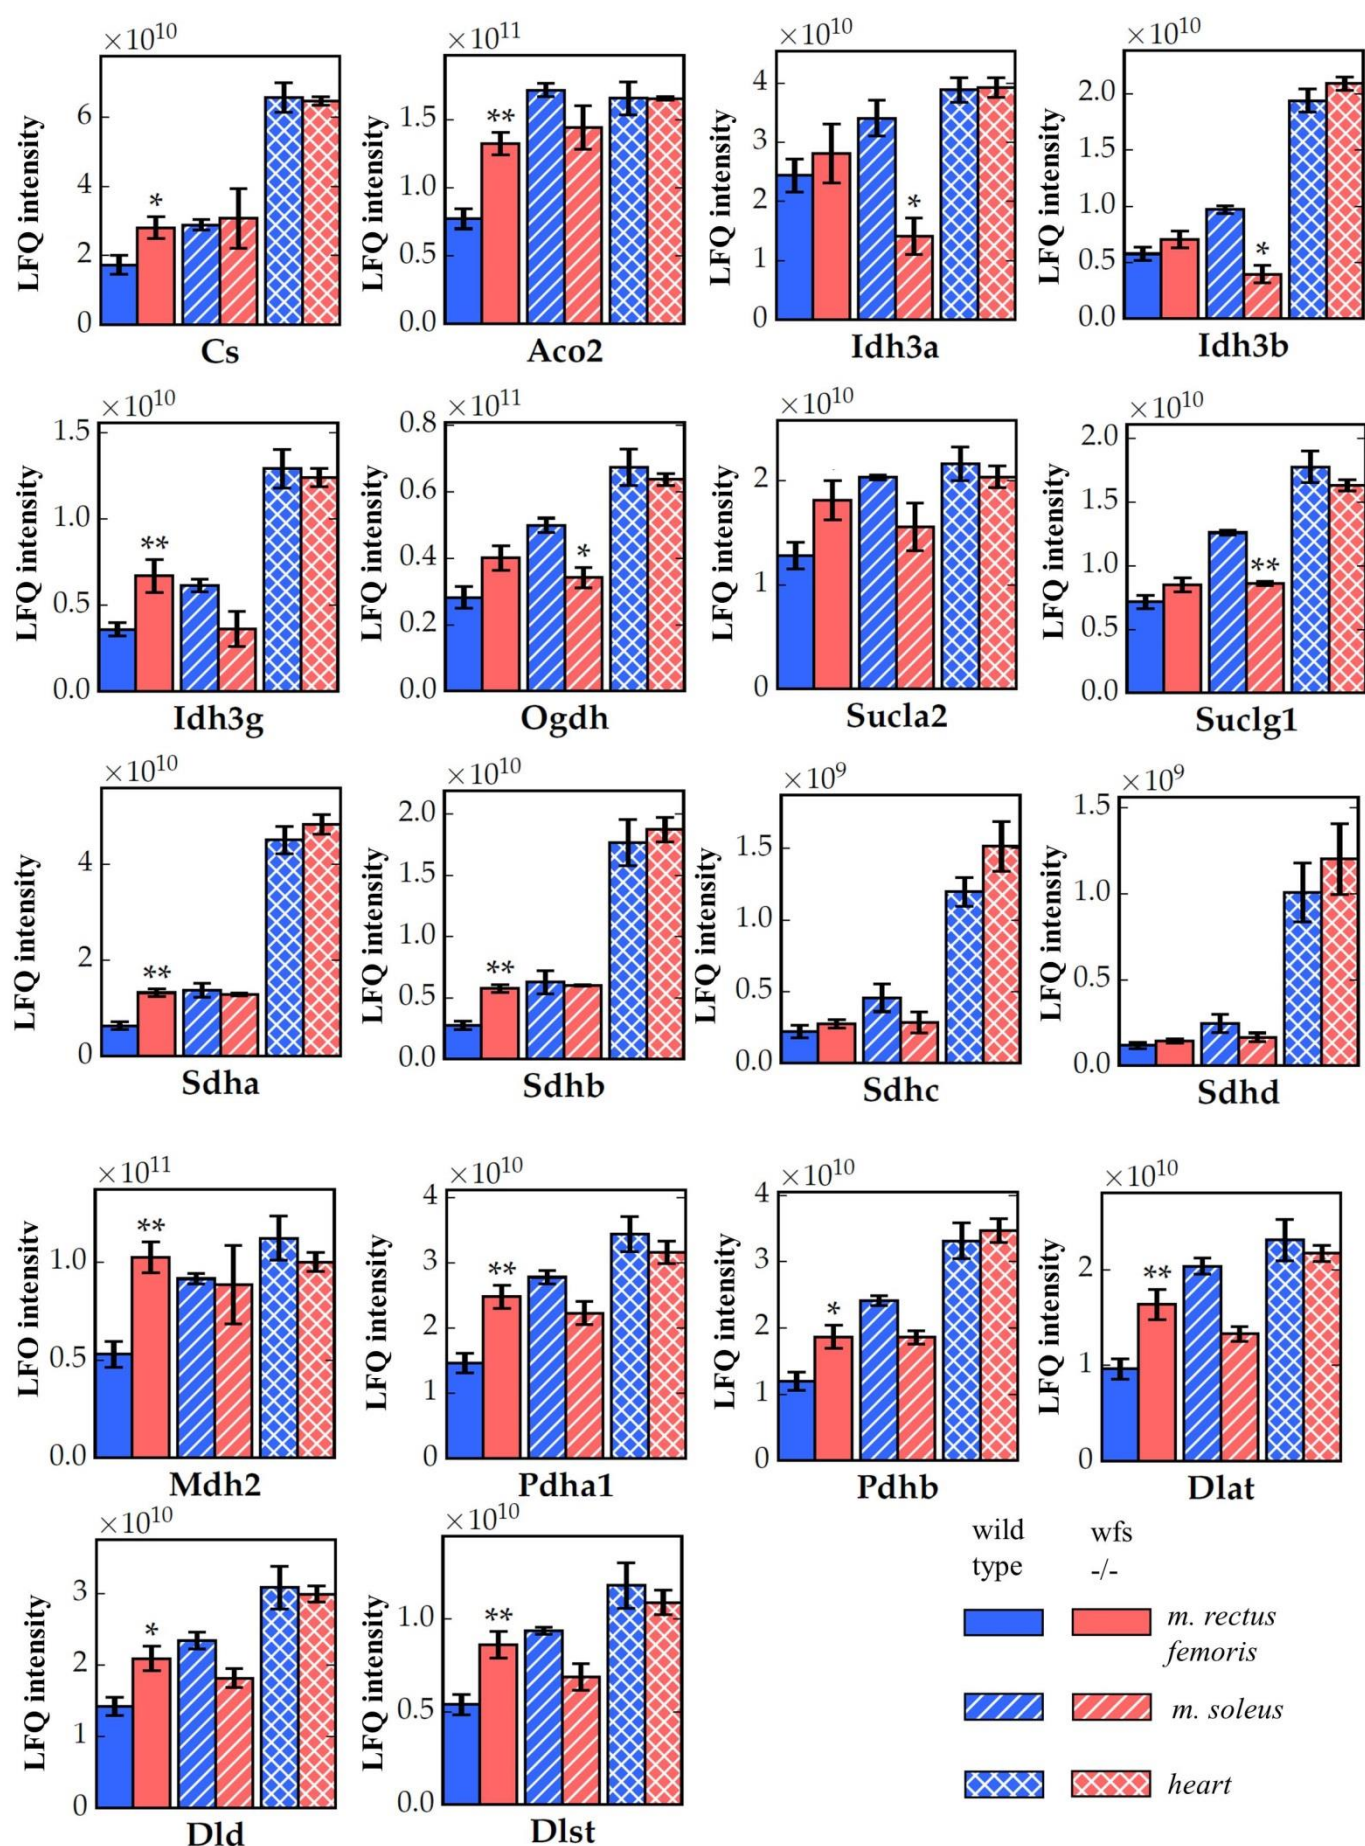

Figure S4. By LC/MS/MS analysis determined amounts of Citrate cycle enzymes and their subunits. Cs – Citrate synthase, Aco2 – Aconitate hydratase, Idh3a – Isocitrate dehydrogenase [NAD] subunit alpha, Idh3b – Isocitrate dehydrogenase [NAD] subunit, Idh3g – Isocitrate dehydrogenase [NAD] subunit gamma 1, Ogdh – 2-oxoglutarate dehydrogenase, Sucla2 – Succinyl-CoA ligase [ADP-forming] subunit beta, Suclg1 – Succinyl-CoA ligase [ADP/GDP-forming] subunit alpha, Sdha – Succinate dehydrogenase [ubiquinone] flavoprotein subunit, Sdhb – Succinate dehydrogenase [ubiquinone] iron-sulfur subunit, Sdhc – Succinate dehydrogenase cytochrome b560 subunit, Sdhc – Succinate dehydrogenase [ubiquinone] cytochrome b small subunit, Mdh2 – Malate dehydrogenase, Pdha1 – Pyruvate dehydrogenase E1 component subunit alpha, Pdhb – Pyruvate dehydrogenase E1 component subunit beta, Dlat – Dihydrolipoyllysine-residue acetyltransferase component of pyruvate dehydrogenase complex, Dld – Dihydrolipoyl dehydrogenase, Dlst – Dihydrolipoyllysine-residue succinyltransferase component of 2-oxoglutarate dehydrogenase complex; \* - p<0.05, \*\* - p<0.01 compared to wild type.



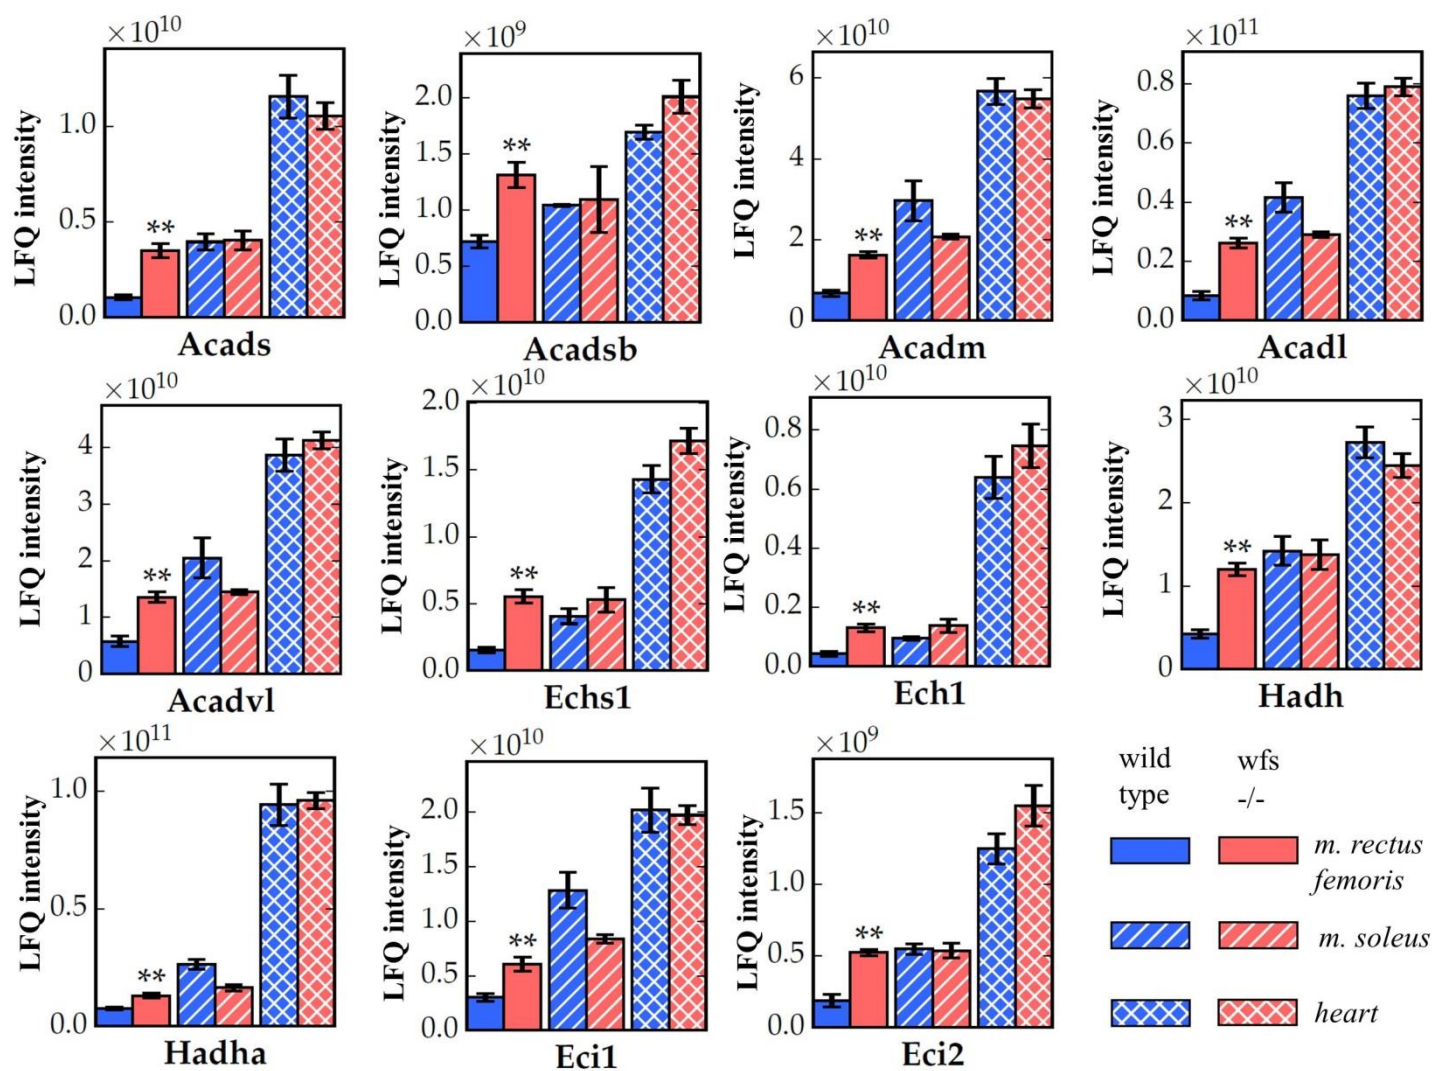

Figure S5. By LC/MS/MS analysis determined amounts of fatty acids beta-oxidation enzymes. Acads - short-chain specific acyl-CoA dehydrogenase Acadsb - short/branched chain specific acyl-CoA dehydrogenase, Acadm - medium-chain specific acyl-CoA dehydrogenase, Acadl - long-chain specific acyl-CoA dehydrogenase, Acadvl - very-long chain specific acyl-CoA dehydrogenase, Echs1 - Enoyl-CoA hydratase, Ech1 - Delta(3,5)-Delta(2,4)-dienoyl-CoA isomerase, Hadh - hydroxyacyl-coenzyme A dehydrogenase, Hadha - trifunctional enzyme subunit alpha, Eci1 - Enoyl-CoA delta isomerase 1, Eci2 - Enoyl-CoA delta isomerase 2 ; \* -  $p < 0.05$ , \*\* -  $p < 0.01$  compared to wild type.

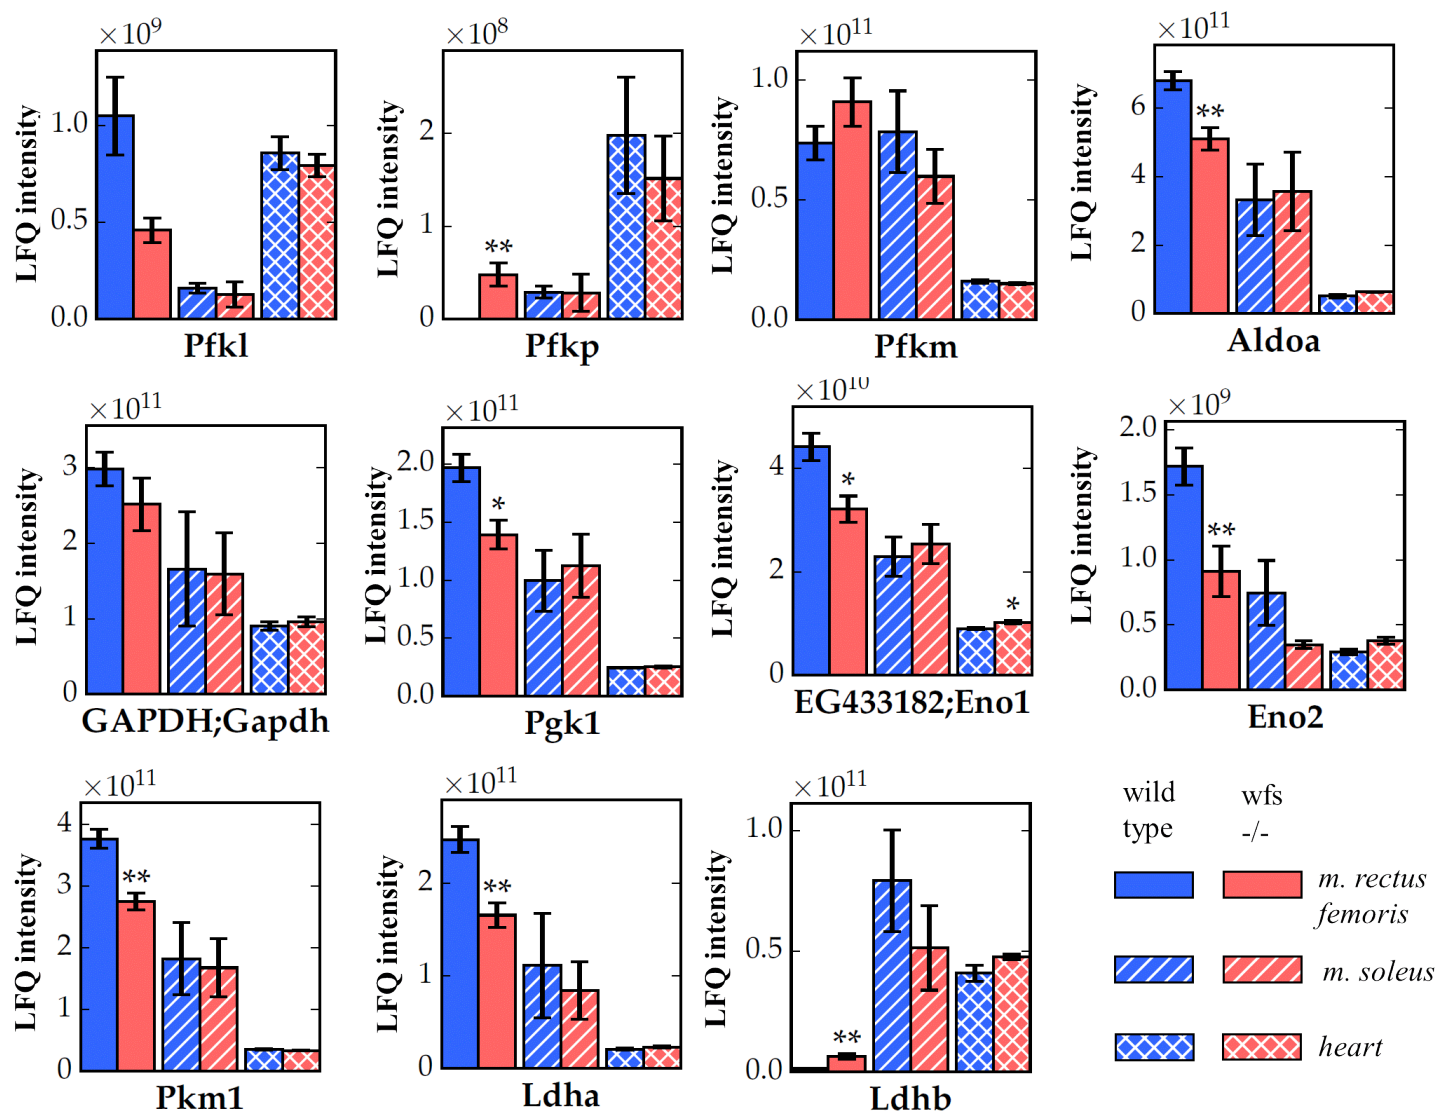

Figure S6. By LC/MS/MS analysis determined amounts of glycolytic enzymes. Pfk1 – ATP-dependent 6-phosphofructokinase, liver type, Pfkp – ATP-dependent 6-phosphofructokinase, platelet type, Pfk – ATP-dependent 6-phosphofructokinase, muscle type, Aldoa – Fructose-bisphosphate aldolase, Gapdh – Glyceraldehyde-3-phosphate dehydrogenase, Pgk1 – Phosphoglycerate kinase, G433182;Eno1 – Alpha-enolase, Eno2 – Gamma-enolase, Ldha – L-lactate dehydrogenase A chain, Ldhb – lactate dehydrogenase B chain; \* -  $p < 0.05$ , \*\* -  $p < 0.01$  compared to wild type.
